# Supplementary material for: Hox gene cluster of the ascidian, Halocynthia roretzi, reveals multiple ancient steps of cluster disintegration during ascidian evolution
Source: PubMed Central journal article supplement (PMC5602962; doi:10.1186/s40851-017-0078-3), 2017-09-15
Supplement: 40851_2017_78_MOESM1_ESM.pdf [file 40851_2017_78_MOESM1_ESM.pdf]

Mm\_Hox-A1[NP\_034579.3]  
KVKRNPPKTKGVGEYGVGQPNAVRTNFTTKQLTELEKEFHFNKYLTRARRVEIAASLQLNETQVKIWFQNRMMKQKKREKEGLLPI  
Mm\_Hox-B1[NP\_032292.3]  
MKVKRNPPKTKAVSELGLGAPGGLRTNFTTROLTELEKEFHFNKYLRRARRVEIAATLELNETQVKIWFQNRMMKQKKREREGGRMP  
Mm\_Hox-D1[NP\_034597.2]  
KVKRNAPKSKLSEYGATSPSAIRTNFSTKQLTELEKEFHFNKYLTRARRIEIANCLQLNDTQVKIWFQNRMMKQKKREREGLLAT  
Mm\_Hox-A2[NP\_034581.1]  
GPAACLGHKESLEIADGSGGGSRRLRTAYTNTQLELEKEFHFNKYLCPRRRVEIAALDLTERQVKVWFQNRMMKHKRQTQCKENQN  
Mm\_Hox-B2[NP\_598793.2]  
ASEVGSPPSDGPGLEPCGGSGSRRLRTAYTNTQLELEKEFHFNKYLCPRRRVEIAALDLTERQVKVWFQNRMMKHKRQTQHREPPE  
Mm\_Hox-A3[NP\_034582.1]  
SGSSSGESCAGDKSPPGQASSKRARTAYTSAQLVELEKEFHFNRYLCPRRVEMANLLNLTERQIKIWFQNRMMKYKDKQKKGMLT  
Mm\_Hox-B3[NP\_034588.2]  
SGGGGGGGGDKSPPGSAASKRARTAYTSAQLVELEKEFHFNRYLCPRRVEMANLLNLSEIQIKIWFQNRMMKYKDKQKAKGLAS  
Mm\_Hox-D3[NP\_034598.2]  
KNSCATSGENCKDPSPPGPAKSRVRTAYTSAQLVELEKEFHFNRYLCPRRVEMANLLNLTERQIKIWFQNRMMKYKDKQKAKGILH  
Mm\_Hox-A4[NP\_032291.1]  
YPWMKKIHVSAVNSSYNGGPKRSRTAYTRQVLELEKEFHFNRYLTPRRRRIEIAHTLCLSERQVKIWFQNRMMKWKDKHKLPTKM  
Mm\_Hox-B4[NP\_034589.3]  
YPWMRKVHVSTVNPNYAGGPKRSRTAYTRQVLELEKEFHFNRYLTPRRRRIEIAHALCLSERQIKIWFQNRMMKWKDKHKLPTKI  
Mm\_Hox-C4[NP\_038581.2]  
YPWMKKIHVSTVNPNYNGGPKRSRTAYTRQVLELEKEFHFNRYLTPRRRRIEIAHSLCLSERQIKIWFQNRMMKWKDKHRLPTKV  
Mm\_Hox-D4[NP\_034599.2]  
YPWMKVVHVNSVNPNYTGPKRSRTAYTRQVLELEKEFHFNRYLTPRRRRIEIAHTLCLSERQIKIWFQNRMMKWKDKHKLPTKG  
Mm\_Hox-A5[NP\_034583.1]  
QIYPWMRKLHISHDNIGGPEGKRARTAYTRYQTELEKEFHFNRYLTPRRRRIEIAHALCLSERQIKIWFQNRMMKWKDKNKLKSM  
Mm\_Hox-B5[NP\_032294.2]  
QIYPWMRKLHISHDMTGPDKRARTAYTRYQTELEKEFHFNRYLTPRRRRIEIAHALCLSERQIKIWFQNRMMKWKDKNKLKSM  
Mm\_Hox-C5[NP\_783857.1]  
PAPPQIYPWMTKLHMSHETDGKRRTSYTRYQTELEKEFHFNRYLTPRRRRIEIANLCLNERQIKIWFQNRMMKWKDKSKMKSKEA  
Mm\_Hox-A6[NP\_034584.1]  
PVYPWMQRMNSCAGAVYGSRRRGRQTYTRYQTELEKEFHFNRYLTPRRRRIEIANALCLTERQIKIWFQNRMMKWKKENKLINSTQ  
Mm\_Hox-B6[NP\_032295.1]  
PVYPWMQRMNSCNSSSFGPSRRRGRQTYTRYQTELEKEFHFNRYLTPRRRRIEIAHALCLTERQIKIWFQNRMMKWKKESKLLSASQ  
Mm\_Hox-C6[NP\_034595.2]  
QIYPWMQRMNSHSGVGYGADRRRGRQIYSRYQTELEKEFHFNRYLTPRRRRIEIANALCLTERQIKIWFQNRMMKWKKESNLTSTLS  
Mm\_Hox-A7[NP\_034585.1]  
HGPAEASFRIYPWMRSSGPDKRGRQTYTRYQTELEKEFHFNRYLTPRRRRIEIAHALCLTERQIKIWFQNRMMKWKKEHKDESQAP  
Mm\_Hox-B7[NP\_034590.2]  
DLAESNFRIYPWMRSSGPDKRGRQTYTRYQTELEKEFHFNRYLTPRRRRIEIAHTLCLTERQIKIWFQNRMMKWKKENKTSRGP  
Mm\_Hox-B8[NP\_034591.1]  
EQSPSPQOLFPMWRPQAAGRRRGRQTYTRYQTELEKEFLFNRYLTPRRRRIEIVSHALGLTERQVKIWFQNRMMKWKKENNKDKFPS  
Mm\_Hox-C8[NP\_034596.1]  
LNQNSSPSLMFPWMPHAPGRRSRGRQTYTRYQTELEKEFLFNRYLTPRRRRIEIVSHALGLTERQVKIWFQNRMMKWKKENNKDKLPG  
Mm\_Hox-D8[NP\_032302.2]  
NQSSSPSQMFPMWRPQAAGRRRGRQTYTRYQTELEKEFLFNRYLTPRRRRIEIVSHTLALTERQVKIWFQNRMMKWKKENNKDKFPA  
Mm\_Hox-A9[NP\_034586.1]  
GDKPPIDPNNPAANWLHARS TRKKRCPYTKHQTELEKEFLFNRYLTPRRRRIEIVARLLNLTERQVKIWFQNRMMKMKKINKDRAKDE  
Mm\_Hox-B9[NP\_032296.2]  
EDKERPDQTNPSANWLHARS SRKKRCPYTKYQTELEKEFLFNRYLTPRRRRIEIVARLLNLSEIQIKIWFQNRMMKMKKMNKEQKE \*  
Mm\_Hox-C9[NP\_032298.1]  
EEKADLDPSNPAANWIHARS TRKKRCPYTKYQTELEKEFLFNRYLTPRRRRIEIVARVNLTERQVKIWFQNRMMKMKKMNKEKTDKE  
Mm\_Hox-D9[NP\_038583.1]  
PPQQQLDPNNPAANWIHARS TRKKRCPYTKYQTELEKEFLFNRYLTPRRRRIEIVARILNLTERQVKIWFQNRMMKMKKMSKEKCPKG  
Mm\_Hox-A10[NP\_032289.2]  
KDSLSSKGENAANWLTAKS GRKKRCPYTKHQTELEKEFLFNRYLTPRRRRIEISRSVHLTDRQVKIWFQNRMMKMKKMNRENRIRE  
Mm\_Hox-C10[NP\_034592.2]  
EAKKEIKAENTGNWLTAKS GRKKRCPYTKHQTELEKEFLFNRYLTPRRRRIEISKTINLTDQVKIWFQNRMMKMKKMNRENRIRE  
Mm\_Hox-D10[NP\_038582.2]  
ESKEEIKSDTPTSNWLTAKS GRKKRCPYTKHQTELEKEFLFNRYLTPRRRRIEISKSVNLTDQVKIWFQNRMMKMKKMSRENRIRE  
Mm\_Hox-A11[P31311.2]  
SPSSSGHTEKAGGSGGQR TRKKRCPYTKYQIRELEREFFSVYINKEKRLQLSRMLNLTDQVKIWFQNRMMKEKKINRDRLQYY  
Mm\_Hox-C11[NP\_001020013.1]  
GSSHSATKEPAKGAAPNAPR TRKKRCPYTKYQIRELEREFFSVYINKEKRLQLSRMLNLTDQVKIWFQNRMMKEKKLSRDRLQYF  
Mm\_Hox-D11[NP\_032299.1]  
EGPPGEAGAEEKSGGTVAPQR SRKKRCPYTKYQIRELEREFFSVYINKEKRLQLSRMLNLTDQVKIWFQNRMMKEKKLN RDRLQYF  
Mm\_Hox-C12[NP\_034593.1]  
LNPGGGLSASGAPWYPIHSR SRKKRCPYTKYQIRELEREFFSVYINKEKRLQLSRMLNLTDQVKIWFQNRMMKMKKRLLEQALS  
Mm\_Hox-D12[NP\_032300.2]  
ASCLRSSLPDGLPWGAAPGR ARKKRCPYTKYQIAELENEFLVNEFINRQKRELSNRLNLSDQVKIWFQNRMMKMKKRVVQREQALA  
Mm\_Hox-A13[NP\_032290.1]  
WKSTLPDVVSHPSDASSYRR GRKKRVPYTKVQLKELEREYATNKFITKDKRRRISATNLSEIQVTIWFQNRMMKMKKVINLKTTS  
Mm\_Hox-B13[AAH51087.2]  
AAFAEPSVQHPPPDGCAFRGRKKRIPYKSGQLRELEREYANKFITKDKRRRISATNLSEIQVTIWFQNRMMKMKKVLAKVKTST  
Mm\_Hox-C13[NP\_034594.1]  
WKSPFPDVVPLQPEVSSYRR GRKKRVPYTKVQLKELEKEYAASKFITKDKRRRISATNLSEIQVTIWFQNRMMKMKKVVSKSKAPH  
Mm\_Hox-D13[NP\_032301.2]  
KSSFPGDVALNQDMCVYRR GRKKRVPYTKVQLKELENEYAANKFITKDKRRRISATNLSEIQVTIWFQNRMMKMKKIVSKLKDVT

Lm\_HoxA1[ACL81429.1] KVKRNPPKTKVGEYGYAGOPNTVVRTNFTTKQLTELEKEFHFNKYLTRARRVEIAAALQQLNETQVKIWFQNRMMKQKKREKEGLIPV  
Lm\_HoxB1[ACL81442.1] KVKRNPPKTKVAEYGVNGOQNTIRTNFTTKQLTELEKEFHFNKYLTRARRVEIAATLELNETQVKIWFQNRMMKQKKREREGITST  
Lm\_HoxC1[ACL81453.1] MKVKRNPPRTGDCVYSGESNGATARTNFTTKQLTELEKEFHFNKYLTRARRVEIASALQQLNETQVKIWFQNRMMKQKKREREGLAVG  
Lm\_HoxD1[ACL81464.1] KVKRNPPKTSKPTFVGCSPVNTARTNFTTKQLTELEKEFHFNKYLTRRRRIEIANALHLNETQVKIWFQNRMMKQKKRGQVGLLST  
Lm\_HoxA2[ACL81434.1] GPACFTQKESPEIPDTAGGSRRLRTAYTNTQLELEKEFHFNKYLCPRRRVEIAALLDLTERQVKVWFQNRMMKHKRQTQCKENQN  
Lm\_HoxB2[ACL81445.1] SGSGVGSPTAQGLQDNNSGSRRLRTAYTNTQLELEKEFHFNKYLCPRRRVEIAALLDLTERQVKVWFQNRMMKHKRQTQHKDNHE  
Lm\_HoxB3[ACL81446.1] NSSPSTESCSGDKSPGSSASKRARTAYTSAQLVELEKEFHFNRYLCPRRRVEEMANLLNLSEIQIKIWFQNRMMKYKKDQKSKGMGS  
Lm\_HoxA3[ACL81435.1] SSCSSGDGCTGDKSPGPASSKRARTAYTSAQLVELEKEFHFNRYLCPRRRVEEMANLLNLSEIQIKIWFQNRMMKYKKDQKSGKMMT  
Lm\_HoxD3[ACL81468.1] KNNCTATGESCEEKSPSGPTSKRVRTAYTSAQLVELEKEFHFNRYLCPRRRVEEMANLLNLSEIQIKIWFQNRMMKYKKDQKAKGIMH  
Lm\_HoxA4[ACL81436.1] YPWMKKIHVCTVNPNYNGGPKRSRTAYTRQVLELEKEFHFNRYLTPRRRRIEIAHTLCLSERQVKIWFQNRMMKWKDHLKLPNTKM  
Lm\_HoxB4[ACL81447.1] PIVYPWMKKVHVNPNTGGEPKRSRTAYTRQVLELEKEFHFNRYLTPRRRRIEIAHSLCLSERQIKIWFQNRMMKWKDHLKLPNTKI  
Lm\_HoxC4[ACL81459.1] YPWMKKIHVSTVNPNYNGGPKRSRTAYTRQVLELEKEFHFNRYLTPRRRRIEIAHSLCLSERQIKIWFQNRMMKWKDHLKLPNTKV  
Lm\_HoxD4[ACL81469.1] YPWMKKVHVNSVNPNYNGGPKRSRTAYTRQVLELEKEFHFNRYLTPRRRRIEIAHTLCLSERQIKIWFQNRMMKWKDHLKLPNTKG  
Lm\_HoxB5[ACL81448.1] PQIFPWRMKLHISHDMTGPDKRARTAYTRYQTELEKEFHFNRYLTPRRRRIEIAHALCLSERQIKIWFQNRMMKWKDNLKLSMSL  
Lm\_HoxA5[ACL81437.1] QIYPWRMKLHISHDSIGGPEGKRARTAYTRYQTELEKEFHFNRYLTPRRRRIEIAHALCLSERQIKIWFQNRMMKWKDNLKLSMSM  
Lm\_HoxC5[ACL81460.1] QSQPQIYPWMTKLHMSHDTDGKRSRTSYTRYQTELEKEFHFNRYLTPRRRRIEIANLCLNERQIKIWFQNRMMKWKDNLKLSKEP  
Lm\_HoxA6[ACL81438.1] PIFPWRMQRMSCTGTEYGTGHRGRGRQTYTRYQTELEKEFHFNRYLTPRRRRIEIANALCLTERQIKIWFQNRMMKWKKEKLLNSTQ  
Lm\_HoxB6[ACL81449.1] PVYPWRMQRMSCTGSAFGPNRGRGRQTYTRYQTELEKEFHFNRYLTPRRRRIEIAHALCLTERQIKIWFQNRMMKWKKENKLLGASQ  
Lm\_HoxA7[ACL81439.1] HPQDENNFRIYPWMRSSGPDKRRGRQTYTRYQTELEKEFHFNRYLTPRRRRIEIAHALCLTERQIKIWFQNRMMKWKKEHKEDNFTS  
Lm\_HoxB7[ACL81450.1] EQONESNFRIYPWMRSTGPDKRRGRQTYTRYQTELEKEFHFNRYLTPRRRRIEIAHALCLTERQIKIWFQNRMMKWKKENKTTTQSL  
Lm\_HoxC8[ACL81462.1] LNQNSPSPMLFPWMRPHAPGRRSGRQTSRYQTELEKEFLFNMYLTPRRRRIEIVSHALGLTERQVKIWFQNRMMKWKKENNKDKLPG  
Lm\_HoxD8[ACL81470.1] QETSSPSQMFPMWRSQAATGRRGRQTYSRFQTELEKEFLFNMYLTPRRRRIEIVSHSLGLTERQIKIWFQNRMMKWKKENNKDTFST  
Lm\_HoxA9[ACL81440.1] GDKPQIDPNNPAANWLHARS TRKKRCPYTKHQTELEKEFLFNMYLTPRRRRIEIVARLLNLTERQVKIWFQNRMMKMKKINKDRSKDE  
Lm\_HoxC9[ACL81463.1] EEKAEKLDPNNPVANWLHARS TRKKRCPYTKYQTELEKEFLFNMYLTPRRRRIEIVARVNLNLTERQVKIWFQNRMMKMKKMNKEKNDKE  
Lm\_HoxD9[ACL81471.1] EKPKQLDPNNPAAIWLHARS TRKKRCPYTKYQTELEKEFLFNMYLTPRRRRIEIVARILDLTERQVKIWFQNRMMKMKKMNKERGNKE  
Lm\_HoxA10[ACL81430.1] KEAIGNAKGENAANWLTAKS GRKKRCPYTKHQTELEKEFLFNMYLTPRRRRIEISRSVHLTDRQVKIWFQNRMMKMKKMNRENRIRE  
Lm\_HoxC10[ACL81454.1] EAKEDMTESATGNWLTAKS GRKKRCPYTKHQTELEKEFLFNMYLTPRRRRIEISKSINLTDQVKIWFQNRMMKMKKMNRENRIRE  
Lm\_HoxD10[ACL81465.1] EGKDGKSEVSTSNWLTAKS GRKKRCPYTKHQTELEKEFLFNMYLTPRRRRIEISRSVNLTDQVKIWFQNRMMKMKKMSRENRIRE  
Lm\_HoxA11[ACL81431.1] SPESSSGNNEEKSSSSSGQR TRKKRCPYTKYQIRELEREFFFSVYINKEKRLQLSRMLNLTDQVKIWFQNRMMKEKKLNDRDLQYY  
Lm\_HoxD11[ACL81466.1] TDLPSDKVVAEKHSNSTSVRSRKKRCPYSKFQIRELEREFFFNVIYINKEKRLQLSRMLNLTDQVKIWFQNRMMKEKKLNDRDLQYF  
Lm\_HoxC12[ACL81456.1] ISNGNSLSTAGAPWYPMHTRSRKKRKPYSKQLQAELEGEFVNEFITRQRRELSDRNLNSDQVQVKIWFQNRMMKMKKRLLLREQALS  
Lm\_HoxD12[ACL81467.1] QSCTRPALTEGLTWCPTQVRSRKKRKPYSKQIAHLENEFLINEFINRQKRELSDRNLNSDQVQVKIWFQNRMMKMKKRLIMREQTL  
Lm\_HoxA13[ACL81432.1] WKSTLPDVVSHPSDANSFRGRKKRVPYTKVQLKELEREYATNKFITKDKRRRISATNLSEIQVTIWFQNRMMKMKKVIINKLKTT  
Lm\_HoxB13[ACL81444.1] WKSALADVVAHQDGSFRGRKKRIPYTKVQLKELEKEYATNKFITKDKRRRISATNLSEIQVTIWFQNRMMKMKKVVAKIKPTT  
Lm\_HoxC13[ACL81457.1] WKSFPDVPVLPQPEVNSYRRGRKKRVPYTKIQLKELEKEYAASKFITKDKRRRISATNLSEIQVTIWFQNRMMKMKKILSKSKAAH

HF\_HOXA1[AAF44639.1]  
KVKRNPPKTKGAGEYGFAGQNTVVRTNFTTKQLTELEKEFHFNKYLTRARRVEIAAALQLNETQVKIWFQNRMMKQKKREKEGLTSA  
HF\_HOXD1[ACY39980.1]  
KVKRNPPKARTTDYGVPSPTSTARTNFTTKQLTELEKEFHFNKYLTRARRVEIANALQLSETQVKIWFQNRMMKQKKRERDGFLAN  
HF\_HOXA2[AAF44640.1]  
AASCLSQKETHIPDNTGGGSRRLRTAYTNTQLELEKEFHFNKYLCPRRRVEIAALDLTERQVKVWFQNRMMKHKRQTQCKENQN  
HF\_HOXD2[ACY39979.1]  
LLATENEDLNEDPDMGSPFDSRRLRTTYTNTQLELEKEFHFNRYLCPRRRVEIAALDLTERQVKVWFQNRMMKHKRQTRFKQSQN  
HF\_HOXA3[AAF44641.1]  
TSSSSSVESSEAGEKSPGPA SKRARTAYTSAQLVELEKEFHFNRYLCPRRRVEIANLNLTERQIKIWFQNRMMKYKDKQKAKGMLT  
HF\_HOXD3[ACY39978.1]  
KNNCTVAGDNCEDKSPGSPSKRVRTAYTSAQLVELEKEFHFNRYLCPRRRVEIANLNLTERQIKIWFQNRMMKYKDKQKSKGIMH  
HF\_HOXA4[AAF44642.1]  
YPWMKIHVTVNPNYTGGE PKRSRTAYTRQVLELEKEFHFNRYLTPRRRRIEIAHTLCLSERQVKIWFQNRMMKWKDKHKLNPNTKM  
HF\_HOXD4[ACY39977.1]  
YPWMKIHVTVNPNYTGGE PKRSRTAYTRQVLELEKEFHFNRYLTPRRRRIEIAHTLCLSERQIKIWFQNRMMKWKDKHKLNPNTKT  
HF\_HOXA5[AAF44643.1]  
QIYPWMRKLHISHDSMGPE GKRARTAYTRYQTLELEKEFHFNRYLTPRRRRIEIAHALCLTERQIKIWFQNRMMKWKDKNKLKSMMS  
HF\_HOXD5[AAF44631.1]  
QIYPWMKMHNLNQEGLSGLE GKRTRTAYTRYQTLELEKEFHFNRYLTPRRRRIEIAHALCLTERQIKIWFQNRMMKWKDKNKLKSNV  
HF\_HOXA6[AAF44644.1]  
PIYPWMQRMNSSSSVFGPH GRRGRQTYTRFQLELEKEFHFNRYLTPRRRRIEIANALCLTERQIKIWFQNRMMKWKKENKLLNTE  
HF\_HOXA7[AAF44645.1]  
HPQAESNFRIYPWMRNAGPD RKRGRQTYTRYQTLELEKEFHFNRYLTPRRRRIEIAHALCLTERQIKIWFQNRMMKWKKETKAGSSST  
HF\_HOXD8[AAF44632.1]  
NQNSSPTQMFPMWRPQAAPG RRRGRQTYSRFQLELEKEFLNPNYLTPRRRRIEIVSHALGLTERQVKIWFQNRMMKWKKENKDKFP  
HF\_HOXA9[AAF44646.1]  
ADKLHMDPNNPSANWLHARS TRKKRCPYTKHQLELEKEFLNMYLTPRRRRIEVARVNLNTERQVKIWFQNRMMKMKKINKERPDKD  
HF\_HOXD9[AAF44633.1]  
EKQQQLDPNHPAINWIHARS TRKKRCPYTKYQLELEKEFLNMYLTPRRRRIEVARILNTERQVKIWFQNRMMKMKKMNKVKNNEE  
HF\_HOXA10[AAF44647.1]  
KETKGEVKAENGANWLTAKS GRKKRCPYTKHQLELEKEFLNMYLTPRRRRIEISRSVHLTDRQVKIWFQNRMMKMKKMNRENRIRE  
HF\_HOXD10[AAF44634.1]  
DNETKEEIKTPISNWLTAKS GRKKRCPYTKYQLELEKEFLNMYLTPRRRRIEISKSVNLTPDRQVKIWFQNRMMKMKKMNRETRIRE  
HF\_HOXD11[AAF44635.1]  
TVESSTGTSATEKNSLSTALR CRKKRCPYTKYQIRELEREFFFNVYINKEKRLQLSRMLNLTDRQVKIWFQNRMMKEKKLSRDRLHFF  
HF\_HOXD12[AAF44636.1]  
VTPVCCRSSDGLPWCPTQVR SRKKRCPYTKQIAELENEFLANEFINRQKRKELSDRLNLSQDQVKIWFQNRMMKMKKRLVMREQTL  
HF\_HOXD13[AAF44637.1]  
KSPLSGDVMHNTDINIYRR GRKKRVPYTKTQLKELEREYATNKFITKEKRRRISTATNLTERQVTIWFQNRVKEKVVSKVKENI

Ci-Hox1[NP\_001122333.1]  
PPKSIYFSQNKMVEYTYGVT GNGRNTNFTTKQLTELEKEFHFNKYLTRARRVEIAAALRLNETQVKIWFQNRMMKQKKRDKEAEKLN  
Ci-Hox2[CAD59668.1]  
-----VRPAGASRRLRTAYTNTQLELEKEFHFNKYLCPRRRIEIAATLLDLTERQVKVWFQNRMMKHKRQQLQSQQD  
Ci-Hox3[NP\_001027669.1]  
KHSSSESNSSGDGDKCYSA SKRERTAYTNSQLVELEKEFHFNRYLCPRRRIEIAQGLGLTERQIKIWFQNRMMKFKKEQKQKAVLQ  
Ci-Hox4[NP\_001027781.2]  
VYYPWMKRIHVSQVINGLES GKRPRAYTRHQVLELEKEFHFNRYLTPRRRRIEIAHGLCLSERQVKIWFQNRMMKWKDKHKLNPNTKV  
Ci-Hox5[CAA05151.1]  
RDAIYYPWMKRIHGGETPDP SKRTRTAYTRYQTLELEKEFHFNRYLTPRRRRIEVAHTLCLTERQIKIWFQNRMMKWKKENKLSLNS  
Ci-Hox6[CAD59670.1]  
SIYCDIYITSPKQPISTGSH RRRGRQTYSRHQLELEKEFHFNRYLTPRRRRIEVAHTLCLTERQIKIWFQNRMMKWKKENKDIAESN  
Ci-Hox10[NP\_001027696.1]  
EETEDAGEEADPTKHWLTAS GRKKRVPYTKYQLELEKEFHFNRYLTPRRRRIEVAKSVKLTDRQVKIWFQNRMMKWKKERREERQD  
Ci-Hox12[NP\_001071736.1]  
PYQTVLPGQHYPPVDVTRHGA QRRRRPYTKYQLESELEREFGANEFISREMREQIAVRVGLNDRQVKIWFQNRMMKMKKMQHRGEQSV  
Ci-Hox13[NP\_001122344.1]  
VMTVSAYCCAALGLQHGSPH SRKKRQPYSKTQISSLEREYKANNFITRQKRENIARDLKLSDRQVKIWFQNRVKKKIKQREIKDN

Mm\_Nkx-2.1[NP\_033411.3]  
GGLGSLGDVSNMPLPSAP RRKRRVLFSAQVYELERRFKQKQKYLAPEREHLASMIHLTPQVKIWFQNHRYKMKRQAKDKAAQO  
Lc\_Nkx-2.1[XP\_005989231.1]  
GSLGSLGEVGSMAPLQSTP RRKRRVLFSAQVYELERRFKQKQKYLAPEREHLASMIHLTPQVKIWFQNHRYKMKRQAKDKAAQO  
Bf\_Nkx-2.1[AA335350.1]  
NMGMSLGTIEGPKPILPTQ RRKRRVLFSAQVYELERRFKQKQKYLAPEREHLAQLINLTPQVKIWFQNHRYKCKRQDKERQKSS

HrHox1(Harore\_Hox1[LC272074])  
PKTNGFYTHGKMDAYGYAGT**AGNGRTNFTTKQLTELEKEFHFNKYLTRARRVEIAAALLLN**NETQVKIWFQ**NRMRKQKKRD**KEAEKLI  
HrHox2(Harore\_Hox2[LC272075])  
QLLPLTENMNFDTGIRPPGT**SRRLRTAYTNTQLELEKEFHFNKYLCRPRRIE**IATLLDLTERQVKVWFQ**NRMRKHKRQ**QOSKQDG  
HrHox3(Harore\_Hox3[LC272076])  
QNARRKQSSSSMSNGDKS**SKRERTAYTNSQLVELEKEFHFNRYLCRPRRIEMAQMLSL**TERQIKIWFQ**NRMRKYKKDQ**KLKVMPI  
HrHox4(Harore\_Hox4[LC272077])  
VYPWMKRIVHSHVFNSEIEP**CKRPRTAYTRHQVLELEKEFHFNRYLTRRRRIE**IAHSLCLTERQVKIWFQ**NRMRKWKKN**DKLPNTKS  
HrHox5(Harore\_Hox5[LC272078])  
EYWYRQHIKLIILFLDEALDS**VKRTRTAYTRYQTLELEKEFHFNRYLTRRRRIE**IAHVLCCLTERQIKIWFQ**NRMRKWKKN**KKIKSLNS  
HrHoxX(Harore\_HoxX[LC272079])  
ANFPNVCLIPMLTYSFPDIP**SQRPRQIYSRHQTELEKEFHFNKYVTKDRMKIANTLNL**TERQVKIWFQ**NRMRKSKKVE**ERKATAAI  
HrHox10(Harore\_Hox10[LC272080])  
DDKLGKGGEDPTKHWLTAS**GRKKRVPTKYQLLELEKEFHFNQYLSR**ERLEVAKTVNL**DRQVKIWFQNRMRKWKKEK**KEEKIRD  
HrHox12(Harore\_Hox11/12/13.a[LC272081])  
YTTIGNNLSPPHFGHHPAS**SRKKRKPYPYTKYQLQ**LELEKEFNANEFISRELRLQIAKRVFLSDRQVKIWFQ**NRMRKMKKRMH**QREKNGD  
HrHox13(Harore\_Hox11/12/13.b[LC272082])  
PPTYSNAMHHHLAHS<sup>SHSS</sup>**SRKKRQPYSKSI**AHLEKEYKKNFITRQKREQISKELSL**DRQVKIWFQNRMRVKDKMK**QRETREA

B1\_Hox1[AFO68803.1]  
LKRNPRTGKPEGYGTTSG**PNNGRNTNFTTKQLTELEKEFHFNKYLTRARRVEIAAALNL**NETQVKIWFQ**NRMRKQKKRE**KENGFST  
B1\_Hox2[AFV93978.1]  
PVFNTOEADAFNSPTDRESS**SRRLRTVFTNTQLELEKEFHFNKYVCKP**RRKEIASFLDLNERQVKIWFQ**NRMRQKRRD**TKSRSEI  
B1\_Hox3[AFO68805.1]  
TNLSVGTTEGTGSPGLGGAA**GKRARTAYTSAQLVELEKEFHFNRYLCRPRRVE**MAAMLNLTERQIKIWFQ**NRMRKYKKEQ**KVKGGS  
B1\_Hox4[AFO68807.1]  
YPWMKKVHSNTGSTSNGQD**PKRSRTAYTRQVLELEKEFHFNRYLTRRRRIE**IAHSLGLTERQIKIWFQ**NRMRKWKKN**DRLPNTKT  
B1\_Hox5[AFV93980.1]  
IPMYPWMRKIHLNHSAGTGD**NKRTRTAYTRYQTLELEKEFHFNRYLTRRRRIE**IAHALCLTERQIKIWFQ**NRMRKWKKN**KLKLSLQ  
B1\_Hox6[AFO68809.1]  
TPPVFPWMRKGSSQTAMGEE**KKRGRQTYTRYQTLELEKEFHFNKYLTRKRRIE**IAHLLGLTERQIKIWFQ**NRMRKWKKN**KIPSLNA  
B1\_Hox7[AFO68811.1]  
LNTAQMTTPIYPWMRSTAPE**RKRGRQTYTRYQTLELEKEFHFNKYLTRRRRIE**IAHALCLTERQIKIWFQ**NRMRKWKKN**KLESKQ  
B1\_Hox8[AFV93982.1]  
AQOSQLAIPFYPWMRTAGPE**RRRGRQTSRYQTLELEKEFHFNRYLTRRRRIE**IAHALGLTERQIKIWFQ**NRMRKMKLKEA**AMLCPK  
B1\_Hox9[ACJ74386.1]  
GDDKHGSALANQPGWMNNHS**SRKKRCPYTRFQTELEKEFLNYMLTR**RRRYEISQHVNLSE**RQVKIWFQNRMRKMKMS**KQRQEQ  
B1\_Hox10[ACJ74389.1]  
TNGASPLHVCGATSWMAPRV**GRKKRCPYTKYQILELEKEFLNMYVSR**RRQEISRHVNLSDRQVKIWFQ**NRMRKMKRMN**KAREEQI  
Bf\_Hox11[AAF81909.1]  
-----TSNWMSAKS**TRKKRCPYTKYQTELEKEFLNMFVTR**RRQEIA**RQNL**TD**RQVKIWFQNRMRKMKRMK**ORAMQOL  
B1\_Hox12[AAF81909.1]  
TADGSEADPNGTDVWVKLQS**SRKKRCPYSKVQLELEKEFLNMYITRE**ORGEI**ARKVNL**TD**RQVKIWFQNRMRKMKRMK**ORHEEEA  
B1\_Hox13[ACJ74390.1]  
SKNVADGPVVAADQSVARG**GRKKRCPYSKYQLSVLEQEYIQ**NRVSR**RETR**LELS**QRLNL**TD**RQVKIWFQNRMRKQKRL**EFRSGNOT  
B1\_Hox14[ACJ74393.1]  
ATKPAETIAHQNGGSLTKP**VRPKRRPYSKYQLNE**ENEYVQ**QYIS**RD**KRLQ**LS**QKLN**TERQVKIWFQ**NRRIKQK**KLDRNSEMC  
B1\_Hox15[ACJ74394.1]  
VTGGTKGFTTTAGTTTQRPR**TRKKRRPYSKPOL**ALLEDEYASQKFL**TK**EK**KEISE**SSSLSERQ**VM**IWFQ**NRMRKEK**KLARAAAQR
