# Supplementary material for: Hox gene cluster of the ascidian, Halocynthia roretzi, reveals multiple ancient steps of cluster disintegration during ascidian evolution
Source: PubMed Central journal article supplement (PMC5602962; doi:10.1186/s40851-017-0078-3), 2017-09-15

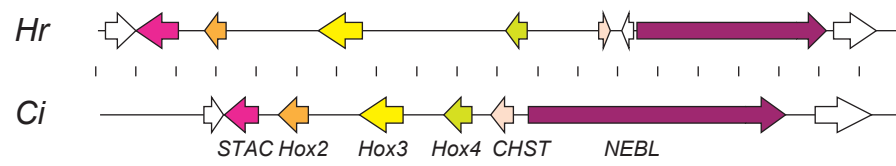

Supplement: 40851_2017_78_MOESM3_ESM.pdf [file 40851_2017_78_MOESM3_ESM.pdf]
